# Supplementary material
Source: Springer Nature journal article supplement (https://www.springermedizin.de/resource/supplementary/13019_2011_562_MOESM1_ESM.pdf/9638840)

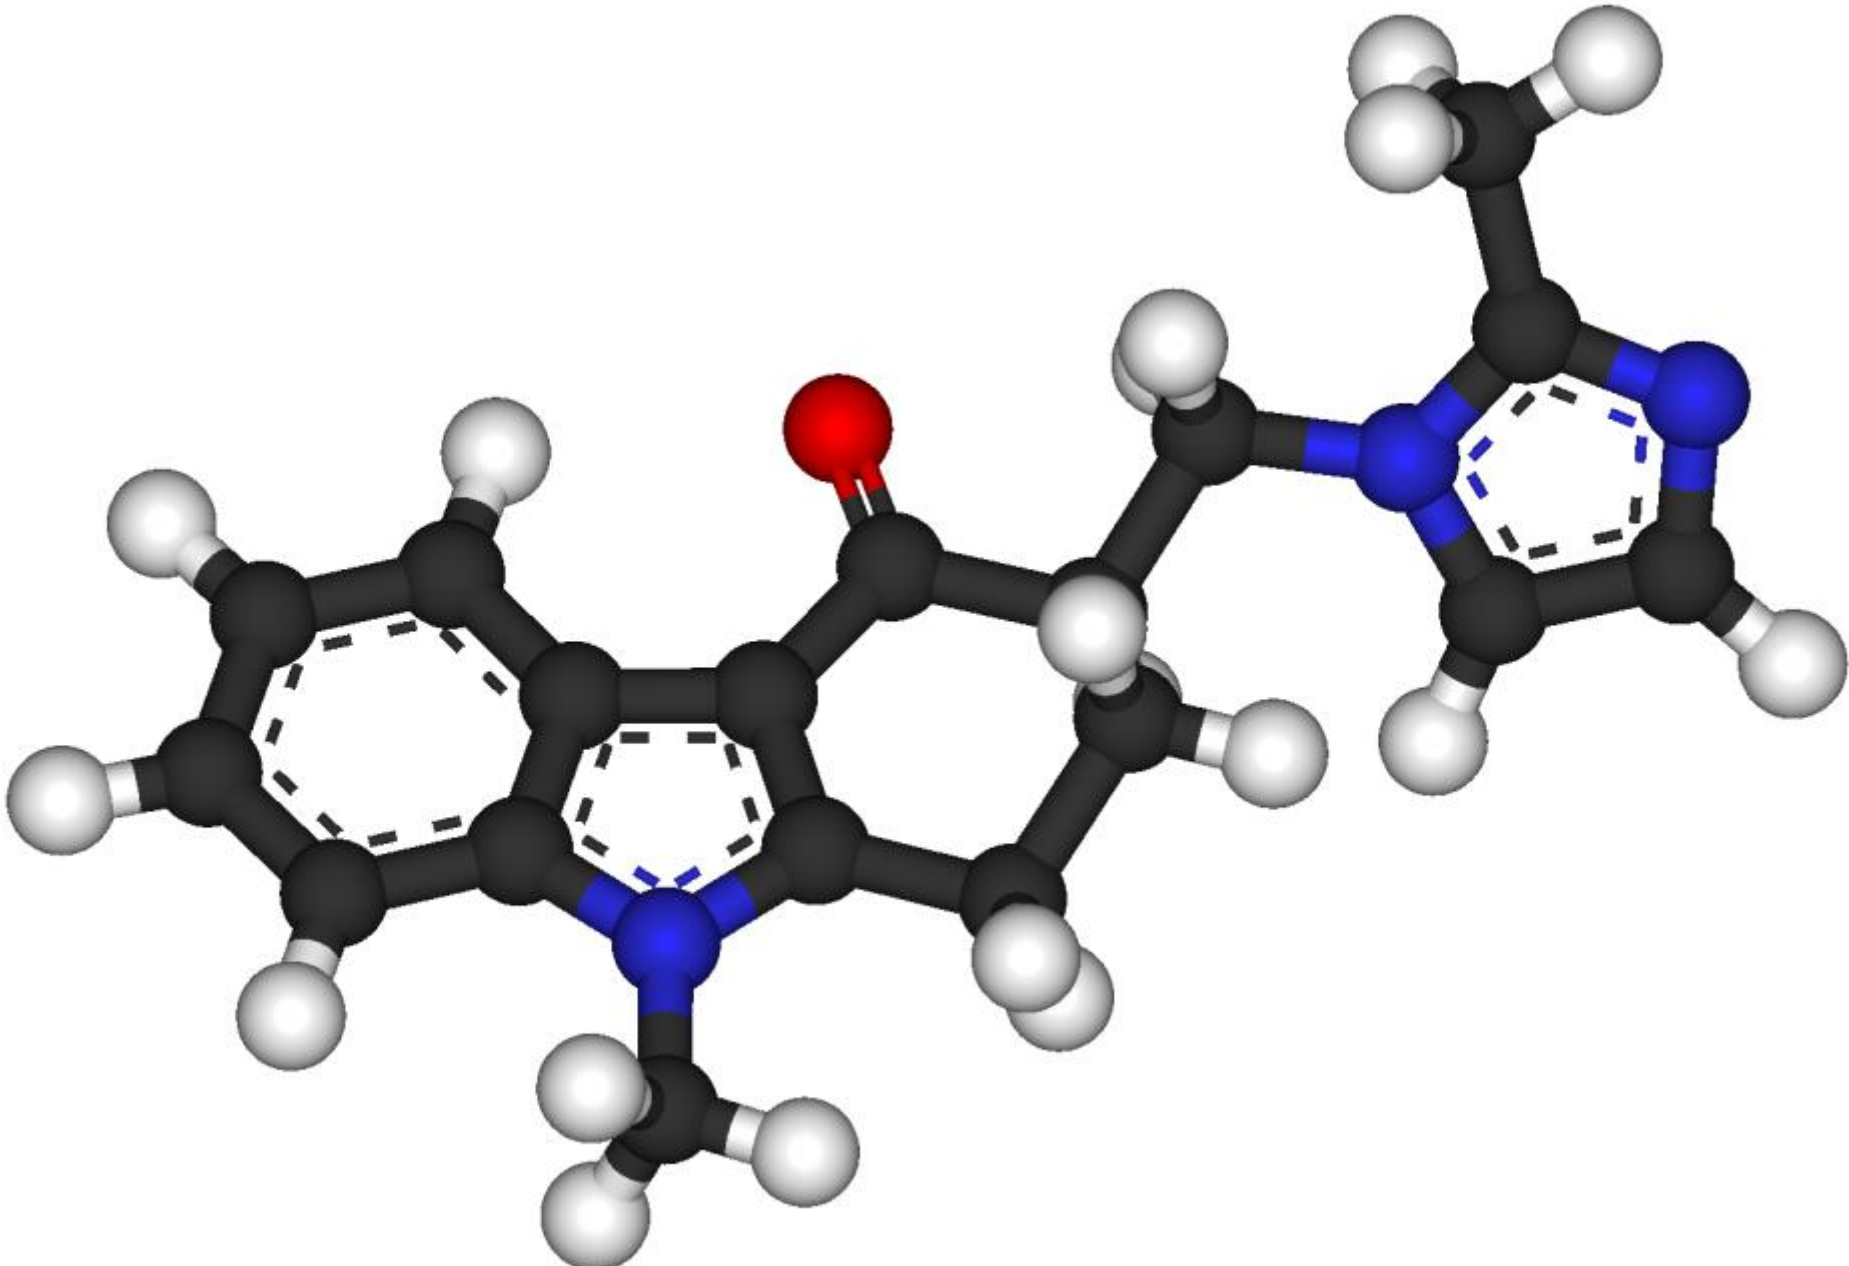

Supplement: MOESM1 [file 9638840]
